# Supplementary material for: Insights on the Evolution of Mycoparasitism from the Genome of Clonostachys rosea
Source: PubMed Central journal article supplement (PMC4350171; doi:10.1093/gbe/evu292), 2015-01-08
Supplement: supp_evu292_Supplementary_file_S2.pdf [file supp_evu292_Supplementary_file_S2.pdf]

**Supplementary file S2: ABC transporter genes and oligonucleotides used for quantitative RT-PCR.**

| Gene name     | Forward primer (5'→3')    | Reverse primer (5'→3')    | Phylogenetic group <sup>1</sup> |
|---------------|---------------------------|---------------------------|---------------------------------|
| <i>abcB1</i>  | GAAGCGCTCATCCCCACTG       | GCGGTTTCGGATTTGACGGATAG   | ABC B-I                         |
| <i>abcB3</i>  | GGACAAAGACGCCCACTCG       | GGTTCGTCCACTTCGGTTCCT     | ABC B-II                        |
| <i>abcB4</i>  | TCGCGGTCAAGGAGGATACTA     | CCAGAGACGGGCGAATGAG       | ABC B-II                        |
| <i>abcB18</i> | CTGGCCGAGATGACTTGGGTAAAT  | AGGTCCGGGCTGAATGTCTGTT    | ABC B-IV                        |
| <i>abcB20</i> | TCAAAGGAAACCGGGCAGAAT     | AGACGGCTTGGACAGGGTTAGAGA  | ABC B-IV                        |
| <i>abcB26</i> | GATGGCTCGCGATTGCTCTC      | AGTAAGGCCGAAAAGTTTGATGTCT | ABC half size B-IV              |
| <i>abcC12</i> | CAACCACGCGACTCACCATTC     | ATAACAACGAGGCGGCAAGATAGA  | ABC C-V                         |
| <i>abcC14</i> | GACCCGAGTATCTGGAGCAAACA   | TCGGGACCCAAGTAGAATGAGC    | ABC C-V                         |
| <i>abcG8</i>  | GCAGTACTTTGAGGAGCTGGGTTTC | GGGCTTCGAGGCGTCTTATTCT    | ABC G-I                         |
| <i>abcG11</i> | GGTTCCCGACTTCCTCACTTCAA   | CGGGGGACCTGGCTCTCG        | ABC G-I                         |
| <i>abcG25</i> | CAGGCCGAGTCCATATTGTCTTCT  | TGCTCCAGGGGCGATTGA        | ABC G-V                         |

<sup>1</sup> Nomenclature of phylogenetic classification is according to Kovalchuk and Driessen (2010).

**References**

Kovalchuk A, Driessen AJM. 2010. Phylogenetic analysis of fungal ABC transporters. *BMC Genomics*. 11:177.
