# Supplementary material for: Insights on the Evolution of Mycoparasitism from the Genome of Clonostachys rosea
Source: PubMed Central journal article supplement (PMC4350171; doi:10.1093/gbe/evu292), 2015-01-08
Supplement: supp_evu292_Supplementary_file_S5.pdf [file supp_evu292_Supplementary_file_S5.pdf]

**Supplementary file S5.** Predicted polyketide synthase, non-ribosomal peptide synthetase and terpenoid synthase assembly lines in *Clonostachys rosea*.

Table 1. Predicted polyketide synthases in the *Clonostachys rosea* genome.

| <b>PKS</b> | <b>Protein Id</b> | <b>Length (aa)</b> | <b>Domains</b>       | <b>Type</b> |
|------------|-------------------|--------------------|----------------------|-------------|
| PKS1       | BN869_T00000928_1 | 1787               | SAT KS AT PT T       | NR          |
| PKS2       | BN869_T00010693_1 | 2622               | SAT KS AT PT T MT R  | NR          |
| PKS3       | BN869_T00000911_1 | 2417               | SAT KS AT PT T MT TE | NR          |
| PKS4       | BN869_T00006898_1 | 2555               | SAT KS AT PT T MT R  | NR          |
| PKS5       | BN869_T00011525_1 | 2700               | KS AT DH MT ER KR T  | HR          |
| PKS6       | BN869_T00008325_1 | 2672               | KS AT DH MT ER KR T  | HR          |
| PKS7       | BN869_T00008884_1 | 2598               | KS AT DH MT ER KR T  | HR          |
| PKS8       | BN869_T00011033_1 | 2357               | KS AT DH ER KR T     | HR          |
| PKS9       | BN869_T00006567_1 | 2530               | KS AT DH ER KR T     | HR          |
| PKS10      | BN869_T00013077_1 | 2375               | KS AT DH ER KR T     | HR          |
| PKS11      | BN869_T00008198_1 | 2428               | KS AT DH ER KR T     | HR          |
| PKS12      | BN869_T00010694_1 | 2600               | KS AT DH MT ER KR T  | HR          |
| PKS13      | BN869_T00013279_1 | 2584               | KS AT DH MT ER KR T  | HR          |
| PKS14      | BN869_T00006415_1 | 2502               | KS AT DH MT ER KR T  | HR          |
| PKS15      | BN869_T00009642_1 | 2349               | KS AT DH ER KR       | HR          |
| PKS16      | BN869_T00013307_1 | 2403               | KS AT DH MT ER KR T  | HR          |
| PKS17      | BN869_T00012010_1 | 2238               | KS AT DH ER KR T     | HR          |
| PKS18      | BN869_T00007381_1 | 2505               | KS AT DH MT ER KR T  | HR          |
| PKS19      | BN869_T00013339_1 | 2346               | KS AT DH ER KR T     | HR          |
| PKS20      | BN869_T00010238_1 | 2411               | KS AT DH MT ER KR T  | HR          |
| PKS21      | BN869_T00007502_1 | 2544               | KS AT DH MT ER KR T  | HR          |
| PKS22      | BN869_T00009884_1 | 2490               | KS AT DH MT ER KR T  | HR          |
| PKS23      | BN869_T00010141_1 | 2614               | KS AT DH MT ER KR T  | HR          |

|       |                   |      |                          |          |
|-------|-------------------|------|--------------------------|----------|
| PKS24 | BN869_T00005452_1 | 2561 | KS AT DH MT ER KR T      | HR       |
| PKS25 | BN869_T00012373_1 | 2707 | KS AT DH MT ER KR T      | HR       |
| PKS26 | BN869_T00013405_1 | 2418 | KS AT DH MT ER KR        | HR       |
| PKS27 | BN869_T00009545_1 | 2000 | KS AT DH MT ER           | HR       |
| PKS28 | BN869_T00005753_1 | 2345 | KS AT DH ER KR T         | HR       |
| PKS29 | BN869_T00010453_1 | 2378 | KS AT DH MT ER KR T      | HR       |
| PKS30 | BN869_T00008531_1 | 271  | KS                       | fragment |
| PKS31 | BN869_T00001420_1 | 430  | KS                       | fragment |
| PKS32 | BN869_T00013212_1 | 3889 | KS AT DH ER KR T C A T R | hybrid   |

Abbreviations: AT=acyl transferase, DH=dehydratase, ER=enoyl reductase, KR=ketoreductase, KS=ketosynthase, PT=product template domain (first ring cyclase), R=reducatse, SAT=starter unit acyl transferase, TE=thioesterase HR=highly reducing, NR=nonreducing, hybrid=PKS-NRPS hybrid.

Table 2. Predicted non-ribosomal peptide synthetase gene clusters and their proposed domain structure in the *Clonostachys rosea* genome.

| <b>NRPS Gene cluster</b> | <b>Protein ID</b> | <b>Length (aa)</b> | <b>Domains</b>                                                                                                                                                                                                                                                                                                                                                                                                                                                                                                                                                                                                                                                                                                                                                                                                                                                                                                                                                                   | <b>Proposed function/ comment</b>             |
|--------------------------|-------------------|--------------------|----------------------------------------------------------------------------------------------------------------------------------------------------------------------------------------------------------------------------------------------------------------------------------------------------------------------------------------------------------------------------------------------------------------------------------------------------------------------------------------------------------------------------------------------------------------------------------------------------------------------------------------------------------------------------------------------------------------------------------------------------------------------------------------------------------------------------------------------------------------------------------------------------------------------------------------------------------------------------------|-----------------------------------------------|
| NPS1                     | BN869_T00013362_1 | 2206               | A <sub>1</sub> T <sub>1</sub> C <sub>1</sub> A <sub>2</sub> T <sub>2</sub> C <sub>2</sub> T <sub>3</sub>                                                                                                                                                                                                                                                                                                                                                                                                                                                                                                                                                                                                                                                                                                                                                                                                                                                                         | putative ETP synthetase                       |
| NPS2                     | BN869_T00008995_1 | 1022               | A <sub>1</sub> X                                                                                                                                                                                                                                                                                                                                                                                                                                                                                                                                                                                                                                                                                                                                                                                                                                                                                                                                                                 | paralog of BN869_T00008995_1                  |
| NPS3<br>(NPS3A, NPS3B)   | BN869_T00006601_1 | 984                | A <sub>1</sub> X                                                                                                                                                                                                                                                                                                                                                                                                                                                                                                                                                                                                                                                                                                                                                                                                                                                                                                                                                                 | paralog of BN869_T00008995_1                  |
|                          | BN869_T00006619_1 | 1285               | A <sub>1</sub> T <sub>2</sub> R                                                                                                                                                                                                                                                                                                                                                                                                                                                                                                                                                                                                                                                                                                                                                                                                                                                                                                                                                  |                                               |
| NPS4<br>(NPS4A, NPS4B)   | BN869_T00007296_1 | 4331               | AT T <sub>0</sub> C <sub>1</sub> A <sub>1</sub> T <sub>1</sub> C <sub>1</sub> A <sub>2</sub> T <sub>2</sub> C <sub>2</sub> A <sub>3</sub> T <sub>3</sub> C <sub>3</sub>                                                                                                                                                                                                                                                                                                                                                                                                                                                                                                                                                                                                                                                                                                                                                                                                          | putative peptaibol synthetase<br>(11 modules) |
|                          | BN869_T00007295_1 | 8453               | A <sub>4</sub> T <sub>4</sub> C <sub>4</sub> A <sub>5</sub> T <sub>5</sub> C <sub>5</sub> A <sub>6</sub> T <sub>6</sub> C <sub>6</sub> A <sub>7</sub> T <sub>7</sub> C <sub>7</sub> A <sub>8</sub> T <sub>8</sub> C <sub>8</sub><br>A <sub>9</sub> T <sub>9</sub> C <sub>9</sub> A <sub>10</sub> T <sub>10</sub> C <sub>10</sub> A <sub>11</sub> T <sub>11</sub> R                                                                                                                                                                                                                                                                                                                                                                                                                                                                                                                                                                                                               |                                               |
| NPS5                     | BN869_T00010383_1 | 5443               | A <sub>1</sub> T <sub>1</sub> C <sub>1</sub> A <sub>2</sub> T <sub>2</sub> C <sub>2</sub> A <sub>3</sub> T <sub>3</sub> C <sub>3</sub> A <sub>4</sub> T <sub>4</sub> C <sub>4</sub> A <sub>5</sub> T <sub>5</sub> C <sub>5</sub>                                                                                                                                                                                                                                                                                                                                                                                                                                                                                                                                                                                                                                                                                                                                                 |                                               |
| NPS6                     | BN869_T00000574_1 | 9406               | A <sub>1</sub> T <sub>1</sub> C <sub>1</sub> A <sub>2</sub> T <sub>2</sub> C <sub>2</sub> A <sub>3</sub> T <sub>3</sub> C <sub>3</sub> A <sub>4</sub> T <sub>4</sub> C <sub>4</sub> A <sub>5</sub> T <sub>5</sub> C <sub>5</sub><br>A <sub>6</sub> T <sub>6</sub> C <sub>6</sub> A <sub>7</sub> T <sub>7</sub> C <sub>7</sub> A <sub>8</sub> T <sub>8</sub> C <sub>8</sub>                                                                                                                                                                                                                                                                                                                                                                                                                                                                                                                                                                                                       |                                               |
| NPS7                     | BN869_T00012973_1 | 6047               | A <sub>1</sub> T <sub>1</sub> C <sub>1</sub> A <sub>2</sub> T <sub>2</sub> C <sub>2</sub> A <sub>3</sub> T <sub>3</sub> C <sub>3</sub> A <sub>4</sub> T <sub>4</sub> C <sub>4</sub> A <sub>5</sub> T <sub>5</sub> C <sub>5</sub><br>A <sub>6</sub> T <sub>6</sub> C <sub>6</sub>                                                                                                                                                                                                                                                                                                                                                                                                                                                                                                                                                                                                                                                                                                 |                                               |
| NPS8                     | BN869_T00008264_1 | 4858               | A <sub>1</sub> T <sub>1</sub> C <sub>1</sub> A <sub>2</sub> T <sub>2</sub> C <sub>2</sub> T <sub>3</sub> C <sub>3</sub> A <sub>4</sub> T <sub>4</sub> C <sub>4</sub> T <sub>5</sub> C <sub>5</sub> T <sub>6</sub> C <sub>6</sub>                                                                                                                                                                                                                                                                                                                                                                                                                                                                                                                                                                                                                                                                                                                                                 | putative ferricrocin siderophore synthetase   |
| NPS9                     | BN869_T00013091_1 | 21815              | A <sub>1</sub> T <sub>1</sub> C <sub>1</sub> A <sub>2</sub> T <sub>2</sub> C <sub>2</sub> A <sub>3</sub> T <sub>3</sub> C <sub>3</sub> A <sub>4</sub> T <sub>4</sub> C <sub>4</sub> A <sub>5</sub> T <sub>5</sub> C <sub>5</sub><br>A <sub>6</sub> T <sub>6</sub> C <sub>6</sub> A <sub>7</sub> T <sub>7</sub> C <sub>7</sub> A <sub>8</sub> T <sub>8</sub> C <sub>8</sub> A <sub>9</sub> T <sub>9</sub> C <sub>9</sub><br>A <sub>10</sub> T <sub>10</sub> C <sub>10</sub> A <sub>11</sub> T <sub>11</sub> C <sub>11</sub> A <sub>12</sub> T <sub>12</sub> C <sub>12</sub> A <sub>13</sub> T <sub>13</sub> C <sub>13</sub><br>A <sub>14</sub> T <sub>14</sub> C <sub>14</sub> A <sub>15</sub> T <sub>15</sub> C <sub>15</sub> A <sub>16</sub> T <sub>16</sub> C <sub>16</sub> A <sub>17</sub> T <sub>17</sub> C <sub>17</sub><br>A <sub>18</sub> T <sub>18</sub> C <sub>18</sub> A <sub>19</sub> T <sub>19</sub> C <sub>19</sub> A <sub>20</sub> T <sub>20</sub> C <sub>20</sub> | putative peptaibol synthetase<br>(20 modules) |
| NPS10                    | BN869_T00012004_1 | 3381               | A <sub>1</sub> T <sub>1</sub> C <sub>1</sub> A <sub>2</sub> T <sub>2</sub> A <sub>3</sub> T <sub>3</sub> A <sub>4</sub> T <sub>4</sub> A <sub>5</sub> T <sub>5</sub> C <sub>5</sub>                                                                                                                                                                                                                                                                                                                                                                                                                                                                                                                                                                                                                                                                                                                                                                                              |                                               |
| NPS11                    | BN869_T00006571_1 | 6728               | C <sub>0</sub> A <sub>1</sub> T <sub>1</sub> C <sub>1</sub> A <sub>2</sub> T <sub>2</sub> A <sub>3</sub> T <sub>3</sub> A <sub>4</sub> T <sub>4</sub> A <sub>5</sub> T <sub>5</sub> C <sub>5</sub><br>A <sub>6</sub> T <sub>6</sub> C <sub>6a</sub> C <sub>6b</sub> A <sub>7</sub> T <sub>7</sub> C <sub>7</sub>                                                                                                                                                                                                                                                                                                                                                                                                                                                                                                                                                                                                                                                                 |                                               |
| NPS12                    | BN869_T00013096_1 | 6368               | C <sub>0</sub> A <sub>1</sub> T <sub>1</sub> C <sub>1</sub> A <sub>2</sub> T <sub>2</sub> C <sub>2</sub> A <sub>3</sub> T <sub>3</sub> C <sub>3</sub> A <sub>4</sub> T <sub>4</sub> C <sub>4</sub><br>A <sub>5</sub> T <sub>5</sub> C <sub>5</sub> A <sub>6</sub> T <sub>6</sub>                                                                                                                                                                                                                                                                                                                                                                                                                                                                                                                                                                                                                                                                                                 | putative peptaibol synthetase                 |
| NPS13                    | BN869_T00012005_1 | 2433               | A <sub>1</sub> T <sub>1</sub> C <sub>1</sub> A <sub>2</sub> T <sub>2</sub> C <sub>2</sub>                                                                                                                                                                                                                                                                                                                                                                                                                                                                                                                                                                                                                                                                                                                                                                                                                                                                                        |                                               |

|       |                   |       |                                                                                                                                                                                                                                                                                                                                                                                                                                                                                                                                                                               |                                                              |
|-------|-------------------|-------|-------------------------------------------------------------------------------------------------------------------------------------------------------------------------------------------------------------------------------------------------------------------------------------------------------------------------------------------------------------------------------------------------------------------------------------------------------------------------------------------------------------------------------------------------------------------------------|--------------------------------------------------------------|
| NPS14 | BN869_T00012688_1 | 1588  | T <sub>1</sub> C <sub>1</sub> A <sub>2</sub> T <sub>2</sub> R                                                                                                                                                                                                                                                                                                                                                                                                                                                                                                                 | Putative incomplete peptaibole synthetase (terminal portion) |
| NPS15 | BN869_T00013464_1 | 6844  | C <sub>0</sub> A <sub>1</sub> T <sub>1</sub> C <sub>1</sub> A <sub>2</sub> T <sub>2</sub> C <sub>2</sub> A <sub>3</sub> T <sub>3</sub> C <sub>3</sub> A <sub>4</sub> T <sub>4</sub> C <sub>4</sub><br>A <sub>5</sub> T <sub>5</sub> C <sub>5</sub> A <sub>6</sub> T <sub>6</sub> C <sub>6</sub>                                                                                                                                                                                                                                                                               | putative peptaibol synthetase                                |
| NPS16 | BN869_T00007957_1 | 12980 | C A <sub>1</sub> T <sub>1</sub> C <sub>1</sub> *A <sub>2</sub> T <sub>2</sub> C <sub>2</sub> A <sub>3</sub> T <sub>3</sub> C <sub>3</sub> A <sub>4</sub> T <sub>4</sub> C <sub>4</sub><br>A <sub>5</sub> T <sub>5</sub> C <sub>5</sub> A <sub>6</sub> T <sub>6</sub> C <sub>6</sub> A <sub>7</sub> T <sub>7</sub> C <sub>7</sub> A <sub>8</sub> T <sub>8</sub> C <sub>8</sub> A <sub>9</sub> T <sub>9</sub> C <sub>9</sub><br>A <sub>10</sub> T <sub>10</sub> C <sub>10</sub> A <sub>11</sub> T <sub>11</sub> C <sub>11</sub> A <sub>12</sub> T <sub>12</sub> C <sub>12</sub> | putative peptaibol synthetase                                |
| NPS17 | BN869_T00006516_1 | 1178  | A <sub>1</sub> T <sub>1</sub> R                                                                                                                                                                                                                                                                                                                                                                                                                                                                                                                                               | 2-aminoadipate reductase                                     |

Abbreviations: A=adenylation domain, AT=acyltransferase, C=condensation domain, T=thiolation domain, R=reductase, \*=truncated.

Table 3. Adenylation domains of NRPS gene clusters, their non-ribosomal specificity code and predicted substrates. Predictions were performed manually or using the NRPSPredictor2 server.

| <b>NRPS Cluster</b>       | <b>Protein Id</b> | <b>A-domain</b> | <b>Nonribosomal Code</b> | <b>Predicted substrate (NRPSPredictor2)</b> |
|---------------------------|-------------------|-----------------|--------------------------|---------------------------------------------|
| NPS1                      | BN869_T00013362_1 | 1               | DACAIGASMK               | Trp <sup>#</sup>                            |
|                           |                   | 2               | DVMAYCAILK               | Ala                                         |
| NPS2                      | BN869_T00008995_1 | 1               | DMWIAACIVK               | hydrophobic-aliphatic                       |
| NPS3<br>(NPS3A,<br>NPS3B) | BN869_T00006601_1 | 1               | DMWIAACIVK               | hydrophobic-aliphatic                       |
|                           | BN869_T00006619_1 | 2               | --WLWNVEVK               | hydrophobic-aliphatic                       |
| NPS4<br>(NPS4A,<br>NPS4B) | BN869_T00007296_1 | 1               | DFCFFAGVVK               | Aib/Iva                                     |
|                           |                   | 2               | DLGIVAAVIK               | hydrophobic-aliphatic                       |
|                           |                   | 3               | DAMVIGAVIK               | hydrophobic-aliphatic                       |
|                           | BN869_T00007295_1 | 4               | DQLMLGAVIK               | hydrophobic-aliphatic                       |
|                           |                   | 5               | DIGWAAGLVK               | Aib/Iva                                     |
|                           |                   | 6               | DLFFGGLSCK               | Pro                                         |
|                           |                   | 7               | DLTYSGGVHK               | Glu                                         |
|                           |                   | 8               | DFVCLGAVMK               | Gly/Ala                                     |
|                           |                   | 9               | DGGMVGNYK                | Gln                                         |
|                           |                   | 10              | DIGFLAH-DK               | Ile                                         |
|                           |                   | 11              | DASVNGAISK               | Leu                                         |
| NPS5                      | BN869_T00010383_1 | 1               | DVSNLSTFKK               | Ala                                         |
|                           |                   | 2               | DVIGVAWVAK               | hydrophobic-aliphatic                       |
|                           |                   | 3               | DVVNVGWAAK               | Ala                                         |
|                           |                   | 4               | DAWGYGMSTK               | Phe,Trp                                     |
|                           |                   | 5               | DVSYAGIQAK               | hydrophobic-aliphatic                       |
| NPS6                      | BN869_T00000574_1 | 1               | DVSNIALIGK               | Leu                                         |
|                           |                   | 2               | DVCILILTFK               | hydrophobic-aliphatic                       |

|      |                   |    |                        |                       |
|------|-------------------|----|------------------------|-----------------------|
|      |                   | 3  | DTNDIGCPTK             | Orn, Lys, Arg         |
|      |                   | 4  | DVSDLSTVKK             | hydrophobic-aliphatic |
|      |                   | 5  | DTQEIGSPTK             | Asp,Asn,Glu,Gln,Aad   |
|      |                   | 6  | HIRNIDMTK <sup>#</sup> | unknown               |
|      |                   | 7  | DQSDIGCPTK             | Leu                   |
|      |                   | 8  | DISDVAMVKK             | hydrophobic-aliphatic |
| NPS7 | BN869_T00012973_1 | 1  | DVLI IAGMCK            | hydrophobic-aromatic  |
|      |                   | 2  | DILIVVGLCK             | hydrophobic-aromatic  |
|      |                   | 3  | DLEEVGTPTK             | Asp,Asn,Glu,Gln,Aad   |
|      |                   | 4  | DVDEIGTPTK             | Asp,Asn,Glu,Gln,Aad   |
|      |                   | 5  | DVDH- -TPTK            | Ala                   |
|      |                   | 6  | DLEEVGTPTK             | Asp,Asn,Glu,Gln,Aad   |
| NPS8 | BN869_T00008264_1 | 1  | DVFELIMIHK             | Gly <sup>#</sup>      |
|      |                   | 2  | DVFSVAGNIK             | Ser <sup>#</sup>      |
|      |                   | 3  | DVLDIGAIGK             | Aho <sup>#</sup>      |
| NPS9 | BN869_T00013091_1 | 1  | DVSMLVAIFK             | Ala                   |
|      |                   | 2  | DLGYMAACFK             | Aib/Iva               |
|      |                   | 3  | DLGFLAGCFK             | Aib/Iva               |
|      |                   | 4  | DVGMVTSINK             | Aad                   |
|      |                   | 5  | DFCFFAAVCK             | Aib/Iva               |
|      |                   | 6  | DMGWVAGCLK             | Aib/Iva               |
|      |                   | 7  | DVCMVAIFK              | Aib/Iva               |
|      |                   | 8  | DYCGIGAICK             | Cys                   |
|      |                   | 9  | DFGFLAVFLK             | Aib/Iva               |
|      |                   | 10 | DWMFGGFINK             | Pro                   |
|      |                   | 11 | DFGLQGAYAK             | Aib/Iva               |
|      |                   | 12 | DLGYLAGCFK             | Aib/Iva               |
|      |                   | 13 | DLGYVAACFK             | Aib/Iva               |
|      |                   | 14 | DIIFGGLICK             | Pro                   |
|      |                   | 15 | DATLIGAVCK             | Leu                   |
|      |                   | 16 | DFGYVGATIK             | Aib/Iva               |

|       |                   |    |            |                       |
|-------|-------------------|----|------------|-----------------------|
|       |                   | 17 | DLGYLAGCFK | Aib/Iva               |
|       |                   | 18 | DIIFGGLICK | Pro                   |
|       |                   | 19 | DFGMFAVFAK | Aib/Iva               |
|       |                   | 20 | DFAFVALVGK | Aib/Iva               |
|       |                   |    |            |                       |
| NPS10 | BN869_T00012004_1 | 1  | DMYFVASPGK | Leu                   |
|       |                   | 2  | DFSFGIVMK  | Leu                   |
|       |                   | 3  | DMFLAAVPGK | aromatic              |
|       |                   | 4  | DLYQVAVPCK | Pro                   |
|       |                   | 5  | DAMLIGAVIK | hydrophobic-aliphatic |
| NPS11 | BN869_T00006571_1 | 1  | DIHIVGAPHK | Leu                   |
|       |                   | 2  | DVSENGTPTK | hydrophilic           |
|       |                   | 3  | DDFSLGGCTK | Lys                   |
|       |                   | 4  | DAMFLIAPLK | hydrophobic-aliphatic |
|       |                   | 5  | DVSATGSIQK | hydrophilic           |
|       |                   | 6  | DVYLIVATNK | Cys                   |
|       |                   | 7  | DAFVLGAVIK | hydrophobic-aliphatic |
| NPS12 | BN869_T00013096_1 | 1  | DMGYVIACIK | hydrophobic-aliphatic |
|       |                   | 2  | DMYSVALCCK | Pro                   |
|       |                   | 3  | DFGLGGMFAK | Ala/Gly               |
|       |                   | 4  | DFGFIGACFK | Aib/Iva               |
|       |                   | 5  | DIIFGGLICK | Pro                   |
|       |                   | 6  | DFGFFAGVAK | Aib/Iva               |
| NPS13 | BN869_T00012005_1 | 1  | DICHCSVIVK | hydrophobic-aliphatic |
|       |                   | 2  | DFSFAGVVIK | hydrophobic-aliphatic |
| NPS14 | BN869_T00012688_1 | 3  | DVYFVCGPFK | hydrophobic-aliphatic |
| NPS15 | BN869_T00013464_1 | 1  | DFGYMGAVFK | Aib/Iva               |
|       |                   | 2  | DLFFGGLSCK | hydrophobic-aliphatic |
|       |                   | 3  | DFGLLGAFIK | hydrophobic-aliphatic |
|       |                   | 4  | DMGYAAGVFK | Aib/Iva               |
|       |                   | 5  | DMLFGGINCK | hydrophobic-aliphatic |

|                                   |                   |    |            |                       |
|-----------------------------------|-------------------|----|------------|-----------------------|
|                                   |                   | 6  | DFGLGGFFAK | hydrophobic-aliphatic |
| NPS16                             | BN869_T00007957_1 | 1  | DFMIFGAVCK | hydrophobic-aliphatic |
|                                   |                   | 2  | n . a .    |                       |
|                                   |                   | 3  | DLGYLAACK  | Aib/Iva               |
|                                   |                   | 4  | DIIFGGLICK | Pro                   |
|                                   |                   | 5  | DFACIAIVAK | hydrophobic-aliphatic |
|                                   |                   | 6  | DAGMMTGVPK | Aib/Iva               |
|                                   |                   | 7  | DIIFGGLICK | Pro                   |
|                                   |                   | 8  | DFGFIAGIVK | Aib/Iva               |
|                                   |                   | 9  | DMGYVAAVLK | Pro                   |
|                                   |                   | 10 | DLGYLAGCFK | Iva                   |
|                                   |                   | 11 | DLGYLAGCFK | Iva                   |
|                                   |                   | 12 | DFAWVGLVAK | hydrophobic-aliphatic |
| NPS17                             | BN869_T00006516_1 | 1  | DPRHFVLRK  | Aad                   |
| PKS32<br>(PKS-<br>NRPS<br>hybrid) | BN869_T00013212_1 | 1  | DVSYIAEVQK | hydrophobic-aliphatic |

Abbreviations of non-proteinogenic substrates: Aad=2-amino adipic acid, Aho= $N^5$ -acyl- $N^5$ -hydroxyornithine, Aib=2-aminoisobutyric acid, Iva=isovaline, Orn=ornithine. n.a.=not applicable, #=manually extracted NRPS code.



Table 4. Predicted terpenoid synthases (TS)<sup>1</sup> in the *Clonostachys rosea* genome.

| TS   | Protein ID        | Gene length (bp) | InterProScan/PFAM ID family domains                   | Description                                                               |
|------|-------------------|------------------|-------------------------------------------------------|---------------------------------------------------------------------------|
| TES1 | BN869_T00002098_1 | 2283             | IPR008949, IPR017446, IPR000092, PF00348, PF03936     | Terpene synthase family, metal binding domain                             |
| TES2 | BN869_T00006434_1 | 1068             | IPR008949, PF03936                                    | Terpene synthase family, metal binding domain                             |
| TES3 | BN869_T00002452_1 | 963              | IPR008949, PF03936, PF06330                           | Terpene synthase family, metal binding domain/Trichodiene synthase (TRI5) |
| TES4 | BN869_T00004037_1 | 1299             | IPR008949, IPR017446, IPR000092, PF00348              | Polyprenyl synthase                                                       |
| TES5 | BN869_T00011314_1 | 1029             | IPR008949, IPR017446, IPR000092, PF00348              | Polyprenyl synthase                                                       |
| TES6 | BN869_T00002638_1 | 1098             | IPR008949, IPR017446, IPR000092, 2 domains of PF00348 | 2 domains of polyprenyl synthase                                          |
| TES7 | BN869_T00000651_1 | 1389             | IPR008949, IPR002060, IPR006449, PF00494              | Squalene/phytoene synthase                                                |
| TES8 | BN869_T00005085_1 | 1743             | IPR008949, IPR002060, IPR017825, PF00494              | Squalene/phytoene synthase and lycopene cyclase                           |

<sup>1</sup> The identification of predicted TS related proteins were based on domain searches using any of the following domains for either InterProScan: IPR008949 = terpenoid\_synth, IPR017446 = polyprenyl\_synth-rel, IPR000092 = polyprenyl\_synth, IPR002060 = Squ/phyt\_synthase, IPR006449 = Squal\_synth, IPR017825 = Lycopene\_cyclase\_dom, or from Pfam v. 27.0 (by using E-value  $\leq$  1.0): PF00348 = polyprenyl synth, PF03936 = Terpene synth C, PF06330 = TRI5, PF00494 = SQS PSY.
